# Supplementary material for: Dissociative electron transfer of copper(ii) complexes of glycyl(glycyl/alanyl)tryptophanin vacuo: IRMPD action spectroscopy provides evidence of transition from zwitterionic to non-zwitterionic peptide structures
Source: Royal Society of Chemistry journal article supplement (doi:10.1039/d0cp02296a), 2020-01-01

## Supplementary Information

**Figure S1** Low-energy CID spectra of the complexes (a)  $[\text{Cu}^{\text{II}}(\text{dien})\text{GAW}]^{2+}$  and (c)  $[\text{Cu}^{\text{II}}(\text{dien})\text{GGW}]^{2+}$  and the species (b)  $[\text{GAW}]^{++}$  and (d)  $[\text{GGW}]^{+}$ .

**Figure S2** Comparison of the theoretical IR spectra (black curve) and the experimental IRMPD spectra of the structures of (a) the  $[\text{Cu}^{\text{II}}(\text{dien})\text{GAW}]^{2+}$ -SB1 complex (magenta), (b)  $[\text{GAW}\pi^{\bullet}]^{+}$ -1 (green), and (c)  $[\text{Cu}^{\text{I}}(\text{dien})]^{+}$ -1 (purple). Theoretical IR spectra were evaluated at the B3LYP/6-311++G(d,p) level. An anharmonicity scaling factor of 0.976 was applied.

**Figure S3** Theoretical IR spectra of some selected low-lying geometries of  $[\text{Cu}^{\text{II}}(\text{dien})\text{GGW}]^{2+}$ : (a) SB1, (b) SB2, (c) SB3, (d) SB4, and (e) CS (black curve), with corresponding IRMPD spectra (pink shaded regions). Energies and spin densities were evaluated at the B3LYP/6-311++G(d,p) level. An anharmonicity scaling factor of 0.976 was applied. Relative energies are in  $\text{kcal mol}^{-1}$ ; bond lengths in Å.

**Figure S4** Theoretical IR spectra of  $[\text{indole}]^{+}$  (blue curve),  $[\text{indole}]^{++}$  (black curve), and  $[\text{indole} - \text{H}]^{\bullet}$  (red curve); wavenumbers:  $1500\text{--}1600 \text{ cm}^{-1}$ .

**Figure S5** Theoretical IR spectra of some selected low-lying geometries of (a)  $[\text{G}\alpha^{\bullet}\text{GW}]^{+}$ , (b)  $[\text{GGW}\pi^{\bullet}]^{+}$ , and (c)  $[\text{GGW}\beta^{\bullet}]^{+}$  (black traces), with relative IRMPD spectra (blue areas). Energies and spin densities were evaluated at the B3LYP/6-311++G(d,p) level. An anharmonicity scaling factor of 0.976 was applied. Relative energies are in  $\text{kcal mol}^{-1}$ ; bond lengths in Å.

**Figure S6** PES of hydrogen atom migrations in  $[\text{Cu}^{\text{II}}(\text{dien})\text{GGW}]^{2+}$ . Energies and spin densities were evaluated at the B3LYP/6-311++G(d,p) level. The upper numbers are enthalpies at 0 K; the lower numbers in parentheses are free energies at 298 K. Relative energies are in  $\text{kcal mol}^{-1}$ . Relative energies are presented in  $\text{kJ mol}^{-1}$  below the PES.

Figure S1

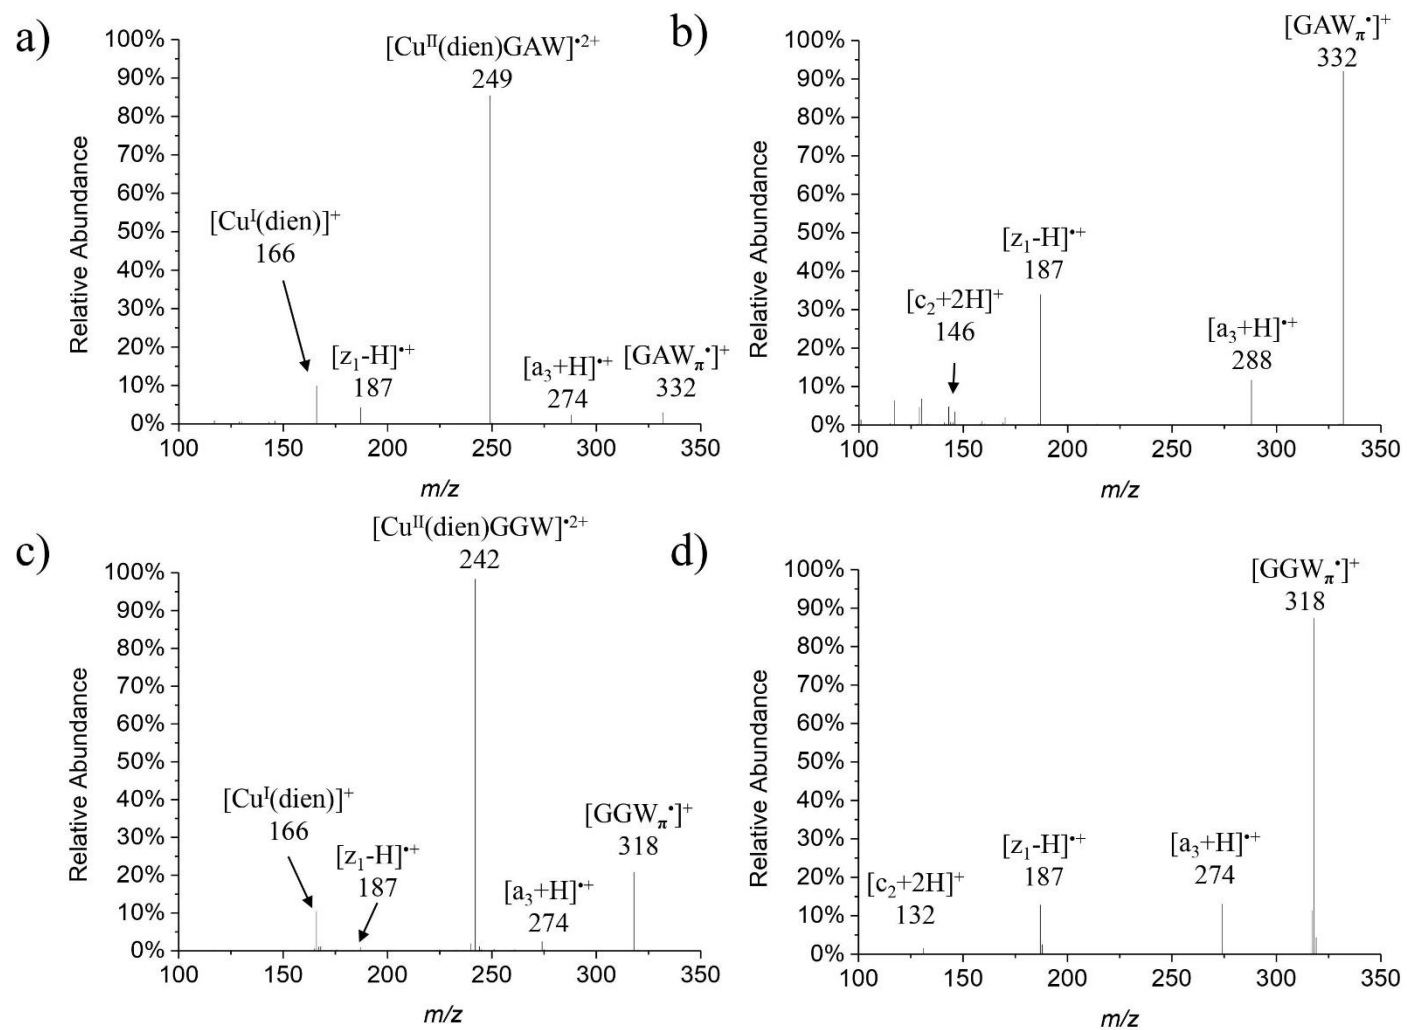

Figure S2

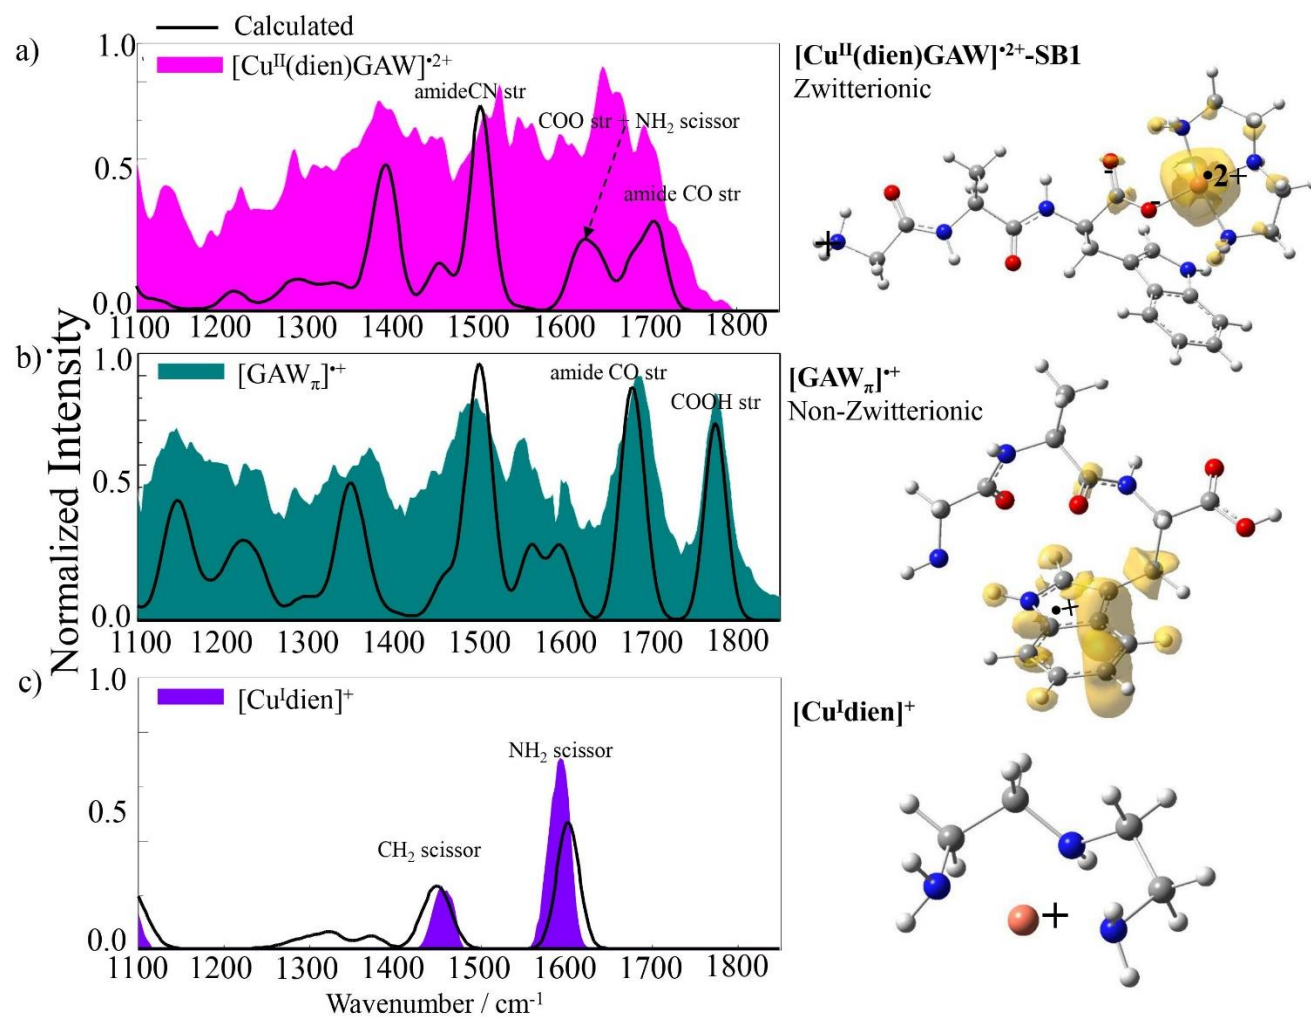

**Figure S3**

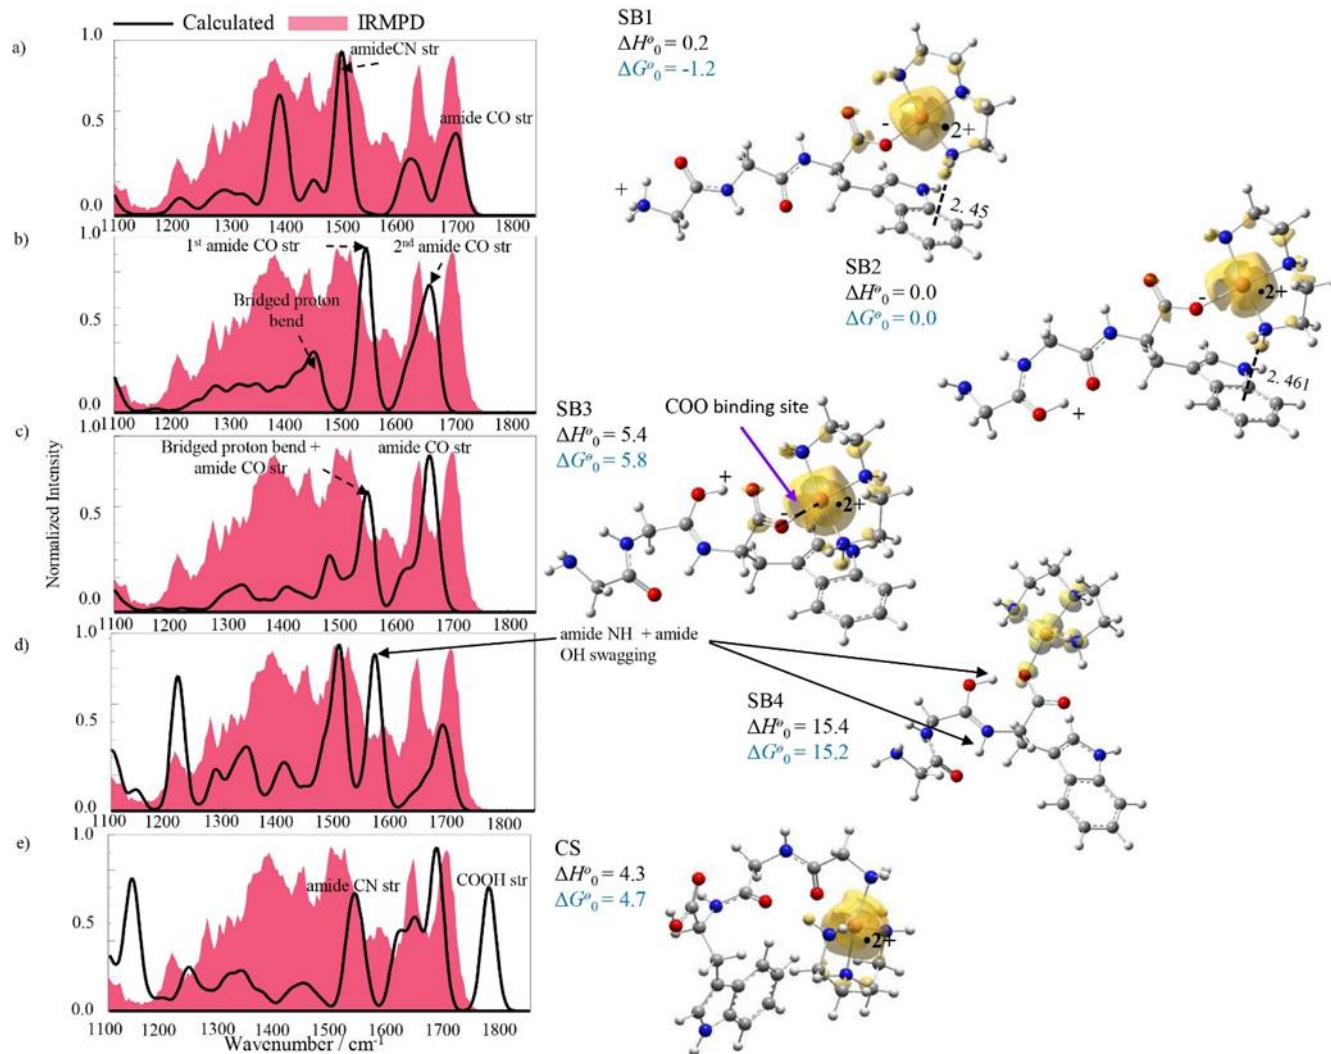

Figure S4

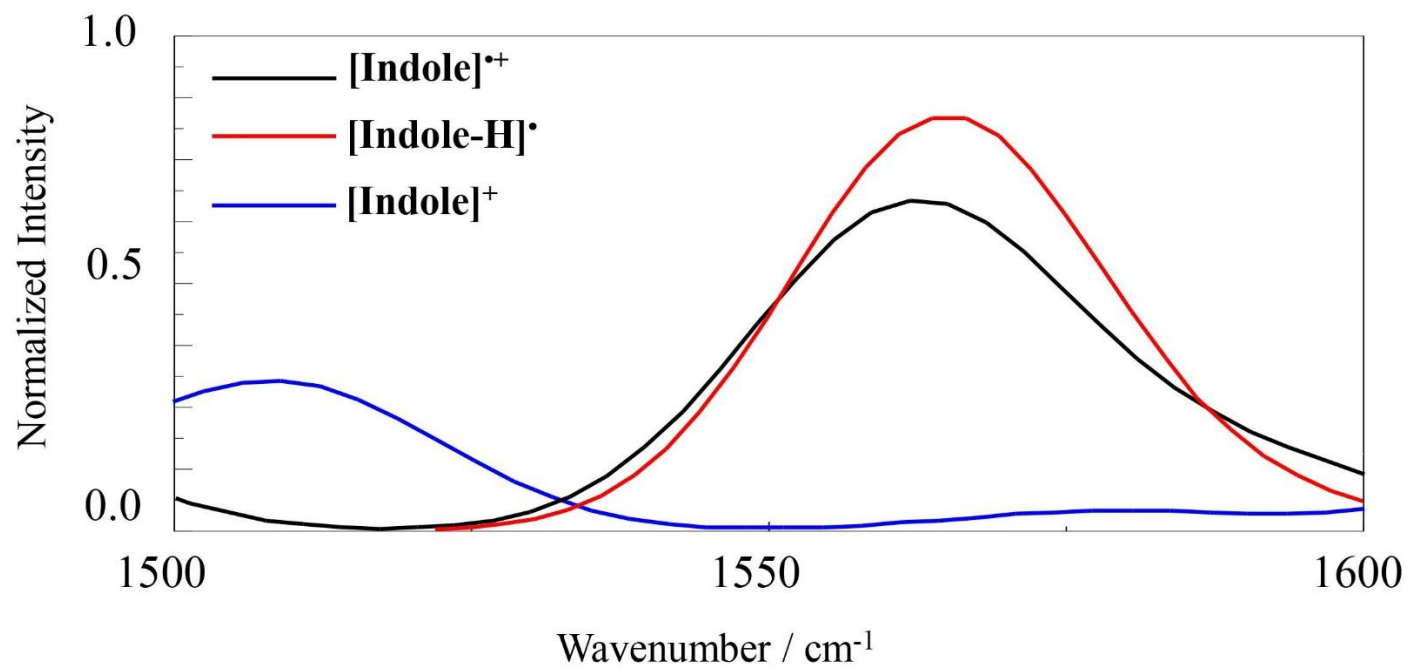

Figure S5

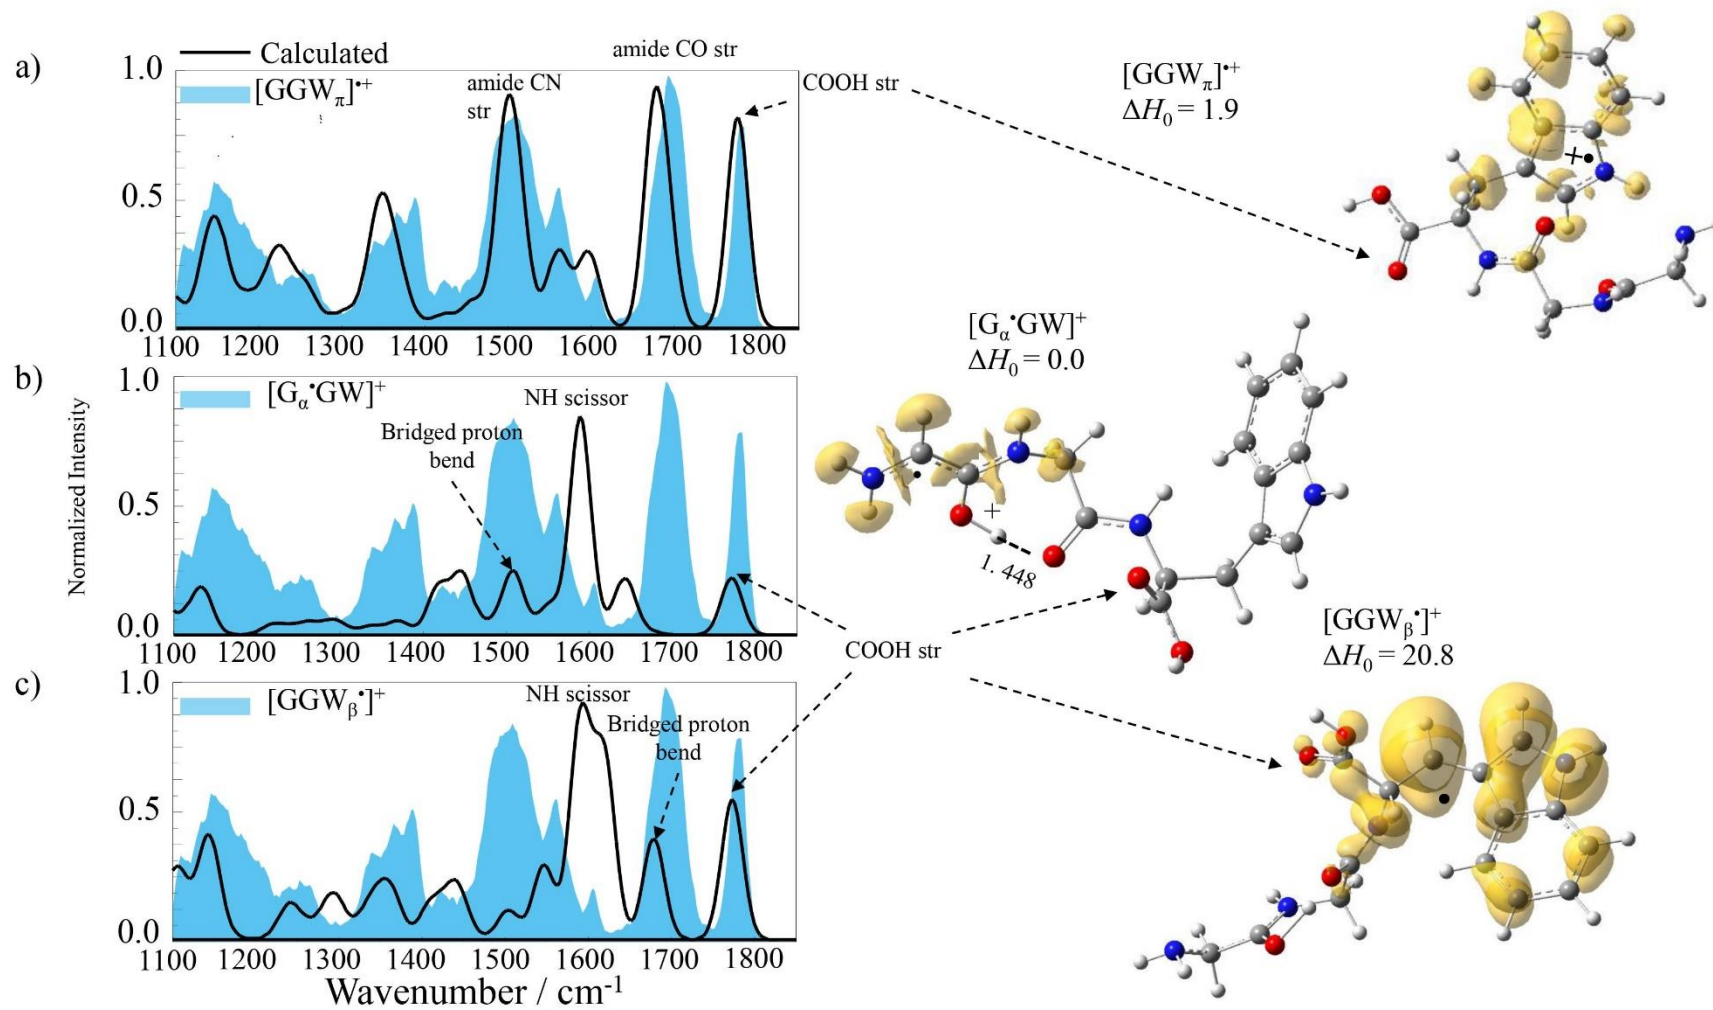

Figure S6

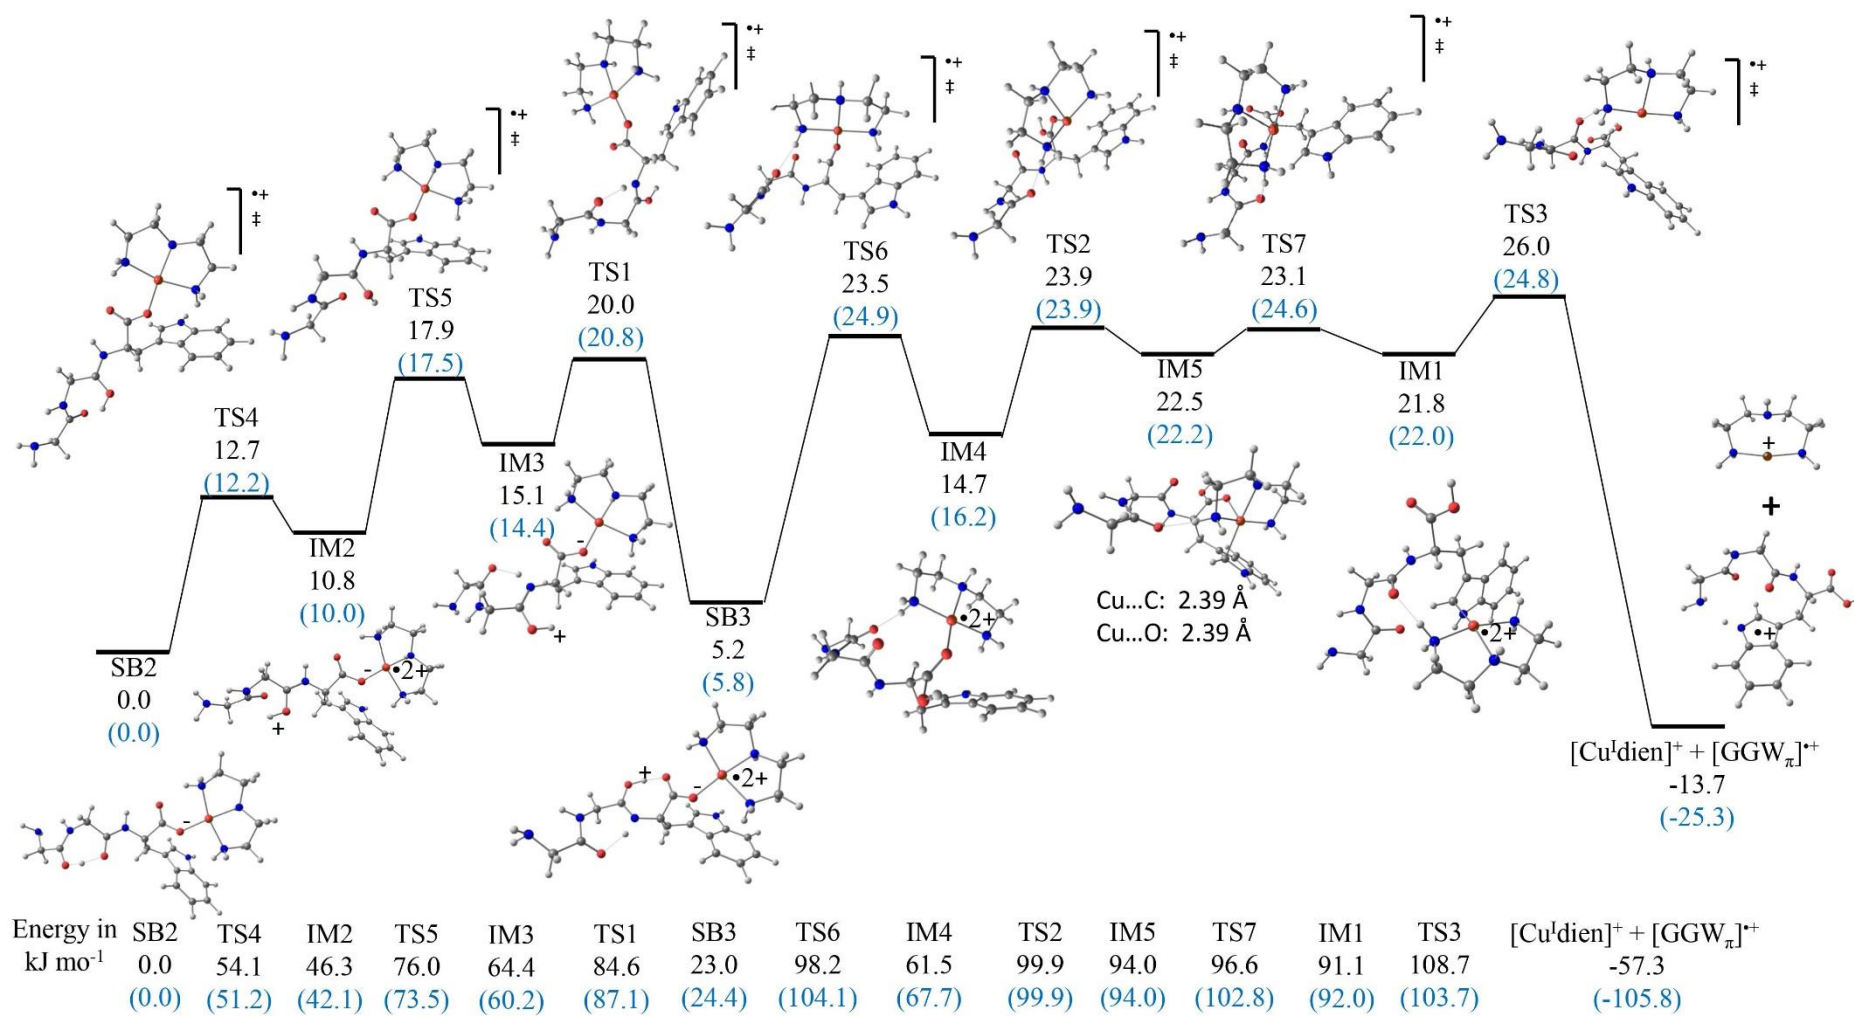

Supplement: d0cp02296a1.pdf [file d0cp02296a1.pdf]
